# Supplementary material
Source: publisher figshare collection journal article supplement (https://future-science-group.figshare.com/articles/dataset/_/21186094)
Supplement: Supplementary file 1 [file 1]

**Electronic Supplementary Information**

**Gold nanoblackbodies mediated plasmonic photothermal cancer therapy for melanoma**

**S1. Characterization of synthesized AuNBs and AuNBs-PEG.**

**S1.1. Hydrodynamic diameter of AuNBs and AuNBs-PEG.**

1. (b)

**Figure S1.** Dynamic light scattering (DLS) data showing the hydrodynamicsize distribution of the synthesized nanoparticles. (a) AuNBs and (b) AuNBs-PEG.

**S2. Photothermal response of the synthesized AuNBs-PEG.**


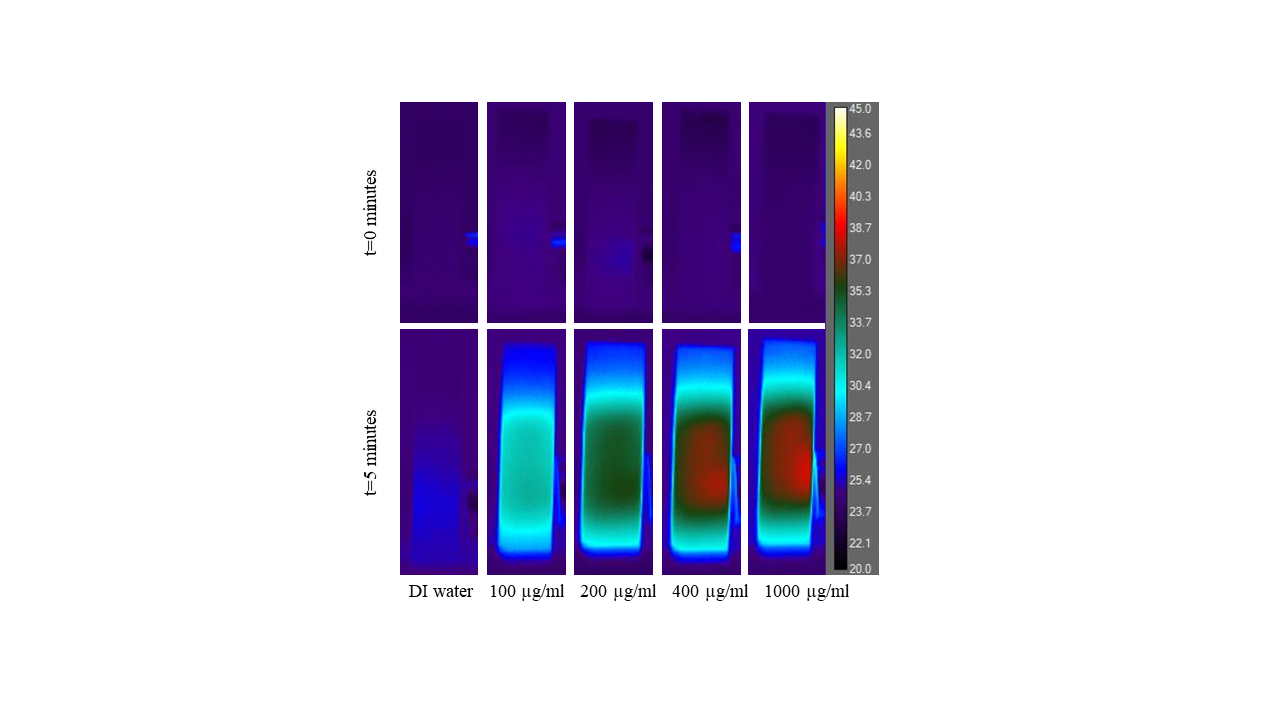


(a)


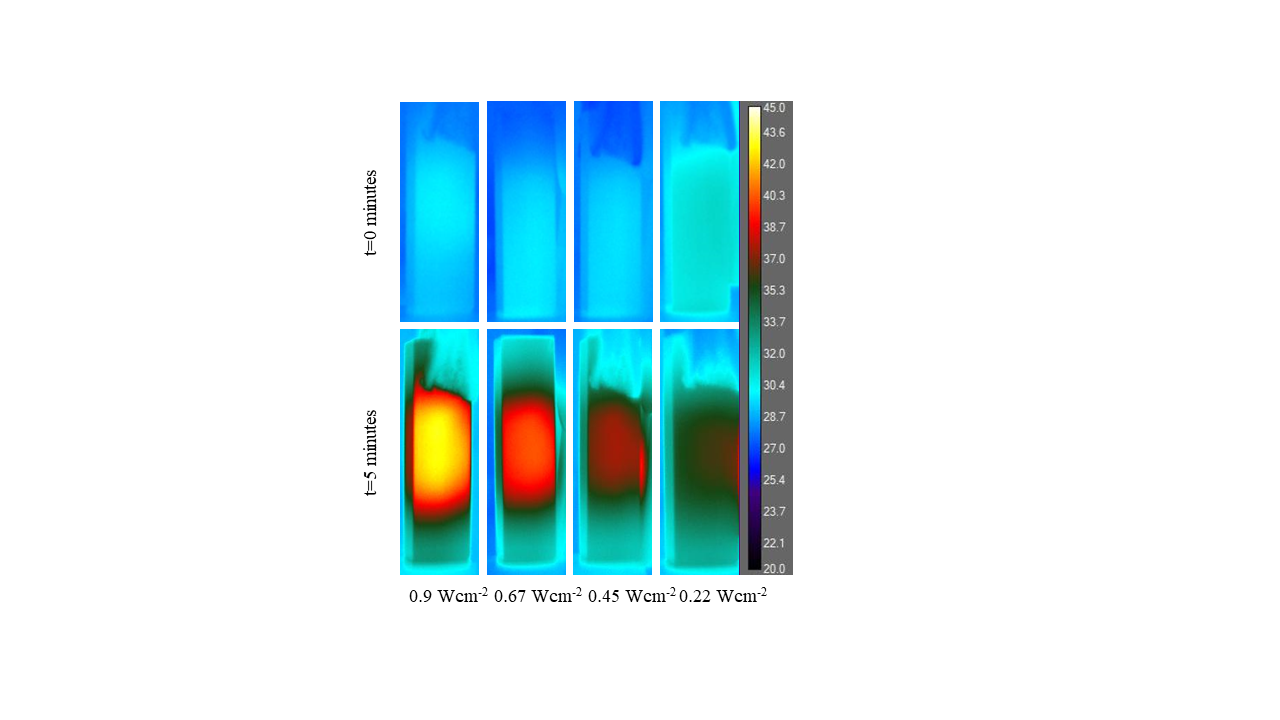


(b)

**Figure S2.** (a) Thermographic images of the cuvette containing DI water and AuNBs-PEG suspensions of various concentrations 100, 200, 400, and 1000 µg/ml and Au content of 14, 28, 56, and 140 µg/ml respectively subjected to NIR irradiation (785/62 nm, 0.9 Wcm-2) for 5 minutes. (b) Thermographic images of AuNBs-PEG suspension (1000 µg/ml concentration, Au content 140 µg/ml) exposed to various irradiation power densities.

**S3. Photothermal Conversion Efficiency (PCE) of AuNBs-PEG.**

The PCE of AuNBs-PEG suspension was calculated using the formula and the method as mentioned below [1,2].

(1)

Here, *h* represents the heat transfer coefficient, and *S* is the surface area of the cuvette. The value of *hS* can be calculated from the cooling period of the AuNBs-PEG suspension. *TMax* is the equilibrium temperature attained by the suspension at the steady-state and *TSurr* is the temperature of the surroundings, *I* is the optical power of incident NIR radiation in Watt, *A* is the absorbance value of the AuNBs-PEG suspension at 785 nm, and *QDiss* expresses the heat dissipated from the light absorbed by the solvent (DI water) and the container (quartz cuvette).

To calculate the value of *hS*, a dimensionless term *θ* is introduced, which is calculated from the cooling period of AuNBs-PEG suspension from Figure S3(a).

(2)

A sample time constant *τs* is defined as,

(3)

Briefly, AuNBs-PEG suspension was irradiated till it attained the steady-state (heating period), and then the NIR irradiation was turned off (cooling period). The rise and drop of temperature were recorded during the heating and cooling period, respectively, as shown in Figure S3(a). The value of *TMax-TSurr* was obtained from the heating curve, and the value of *θ* was calculated from the cooling period and equation (2). The value of *τs* was calculated using equation (3), i.e., from the slope of the linear plot of time versus *-ln(θ)* as shown in Figure S3(b).

1. (b)

**Figure S3.** (a) Variation in temperature of AuNBs-PEG suspension (400 µg/ml, Au content 56 µg/ml) and DI water upon NIR irradiation (785/62 nm, 0.75 Wcm-2) during heating (Irradiation ON) and cooling period (Irradiation OFF). Linear time versus *-ln(θ)* of AuNBs-PEG suspension obtained from the cooling period of (a).

From equations (2) and (3) and Figure S3, the value of *TMax*, *TSurr,* and *τs* were 51.8°C, 30.4°C, and 575.3 seconds respectively.

The value of *hS* can be calculated from the equation below,

(4)

where*,* = *mwater×Cwater+mquartz×Cquartz.* (*m* and *C* represent the mass and heat capacity of the respective components written in the subscript).

Here, *mwater* is 3 g, *mquartz*is 5.7 g, *Cwater* is 4.2 J/g°C, and *Cquartz* is 0.8925°C.

The value of *h*S was calculated from equation (4) and estimated to be 0.03.

*QDiss* is the heat dissipated from the light absorbed by the quartz sample cell containing DI water, and it was calculated to be 0.08 W using the expression *(*,where, *= mwater×Cwater+mquartz×Cquartz* and *ΔT* represents the change in temperature of DI water during the heating period).

The optical power *I* incident on the sample was 1 W, and the value of *A* was obtained from the absorbance spectra of the AuNBs-PEG (400 µg/ml, Au content 56 µg/ml) was found to be 1.33.

Substituting all the values in equation (1), the value of PCE was found to be 60.3%.

**S4. Tumor volumes and body weights of all the mice in different groups from the day of tumor implantation till 2 weeks post-treatment.**

**Table S1.** Weekly measurements record of tumor volumes and body weights of mice in different groups.

| Group No. and Name | | | 1. PBS | | | 2. PBS+NIR | | | 3. AuNBs-PEG | | | 4. AuNBs-PEG+NIR | | |
| --- | --- | --- | --- | --- | --- | --- | --- | --- | --- | --- | --- | --- | --- | --- |
| Mice No. | | | 1 | 2 | 3 | 1 | 2 | 3 | 1 | 2 | 3 | 1 | 2 | 3 |
| Before Treatment | Day 0 | Body weight (g) | 24 | 23 | 21 | 24 | 23 | 21 | 24 | 24 | 21 | 19 | 21 | 23 |
| Tumor volume (mm3) | 0 | 0 | 0 | 0 | 0 | 0 | 0 | 0 | 0 | 0 | 0 | 0 |
| Day 7 | Body weight (g) | 34 | 35 | 30 | 32 | 31 | 30 | 31 | 35 | 33 | 30 | 31 | 35 |
| Tumor volume (mm3) | 171 | 126 | 196 | 405 | 365 | 320 | 126 | 196 | 171 | 126 | 196 | 320 |
| Treatment Day | Day 14 | Body weight (g) | 32 | 37 | 31 | 34 | 36 | 29 | 30 | 35 | 33 | 31 | 32 | 35 |
| Tumor volume (mm3) | 171 | 126 | 445 | 1437 | 1913 | 1913 | 171 | 1859 | 196 | 171 | 126 | 108 |
| After Treatment | Day 21 | Body weight (g) | 32 | 38 | 33 | 34 | 37 | 28 | 30 | 34 | 32 | 31 | 32 | 34 |
| Tumor volume (mm3) | 847 | 365 | 550 | 2138 | 2916 | 4212 | 63 | 4050 | 221 | 0 | 0 | 0 |
| Day 28 | Body weight (g) | 35 | 38 | 36 | 34 | 38 | 33 | 35 | 35 | 36 | 34 | 35 | 38 |
| Tumor volume (mm3) | 1437 | 1008 | 787 | 4800 | 4212 | 7744 | 40 | 5200 | 908 | 0 | 0 | 0 |

**S5. *In vivo* biodistribution of AuNBs-PEG.**

To monitor the accumulation of AuNBs-PEG in the tumor and major mice organs, melanoma bearing C57/BL6 mice were divided into 3 groups (n=3), namely, 12 h, 24 h, and 36 h. The mice in all these groups were intravenously injected with AuNBs-PEG (100 µL, 10 mg/ml concentration, Au content 1.4 mg/ml) and were sacrificed at corresponding time points, i.e., 12 h, 24 h, and 36 h. Tumors and other major organs (liver, spleen, and kidney) were collected, weighed and digested to measure the Au content using ICP-MS. The obtained Au content (in terms of % injected dose/g of organ) in tumor and major organs at 12 h, 24 h, and 36 h, is shown in Figure S4.





**Figure S4.** *In vivo* biodistribution of AuNBs-PEG in tumor and major organs of mice at various time points. Each group consisted of 3 mice, and the data is represented as mean±standard deviation (n=3).

**S6. Thermographic images of the mice and corresponding tumor temperatures weighted averaged over the entire tumor surface.**

The thermographic images of the mice from Group 2 (PBS+NIR) and Group 4(AuNBs-PEG+NIR) during NIR irradiation are shown in Figures S5(a, b) and S5(c, d). The temperatures attained at the entire tumor surface were calculated using Image J software by the weighted average of the surface temperatures attained at various radial locations. The calculated tumor temperatures for each mice from both groups are summarized in Table S2.


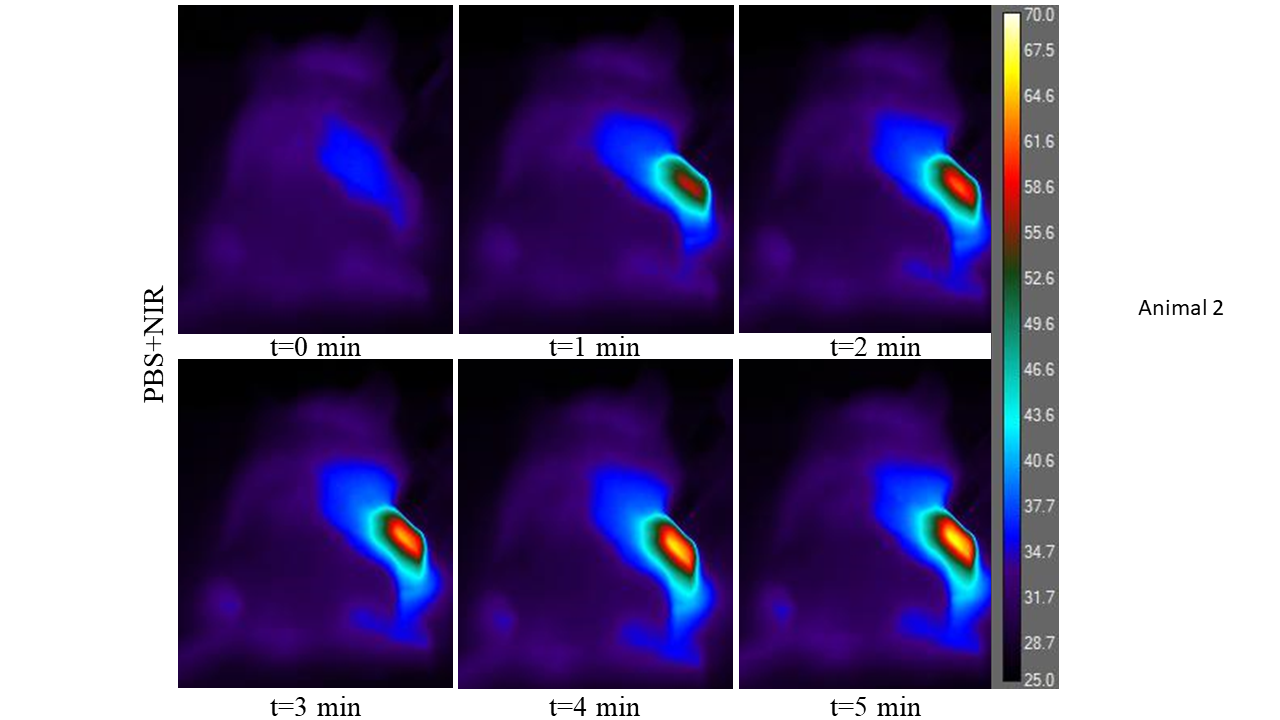


(a)


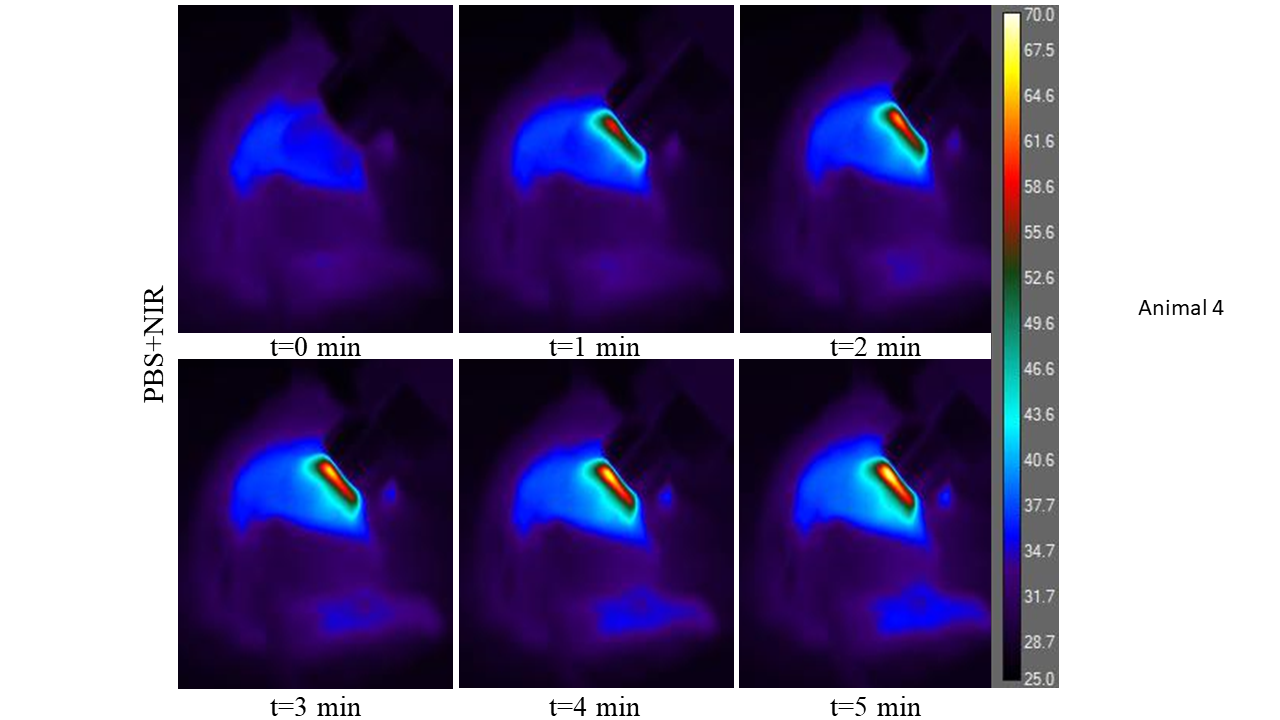


(b)


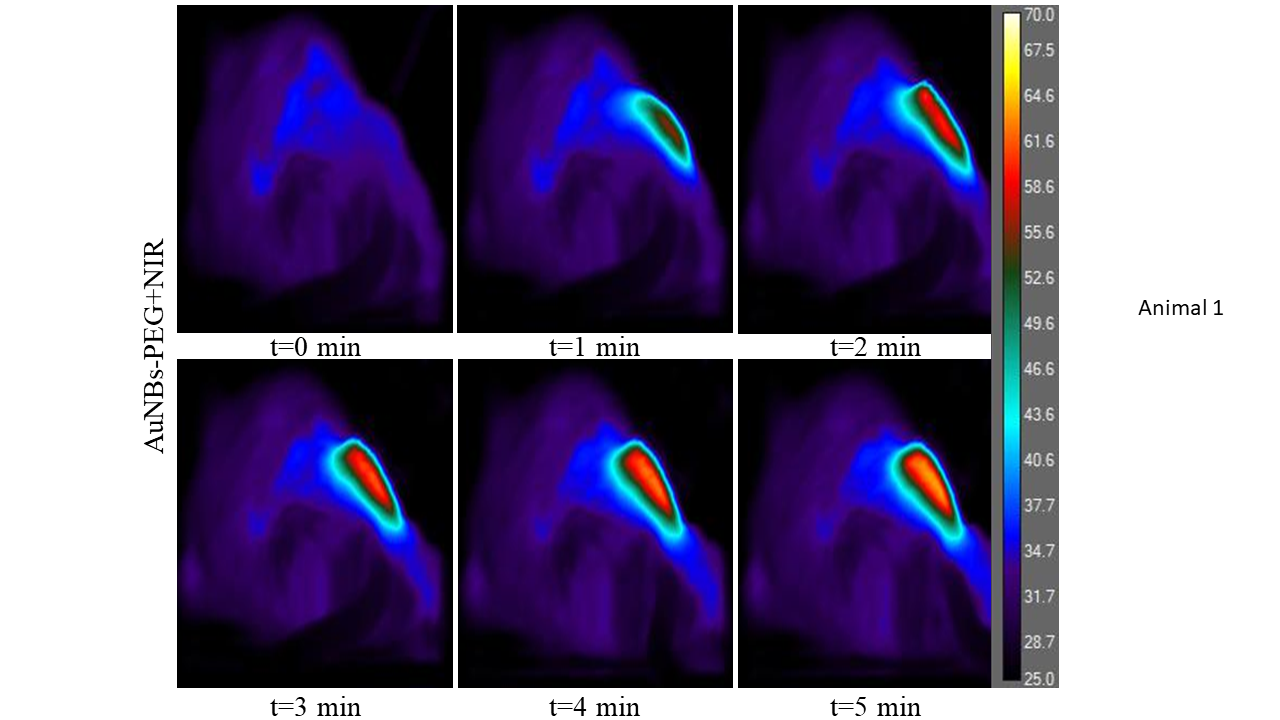


(c)


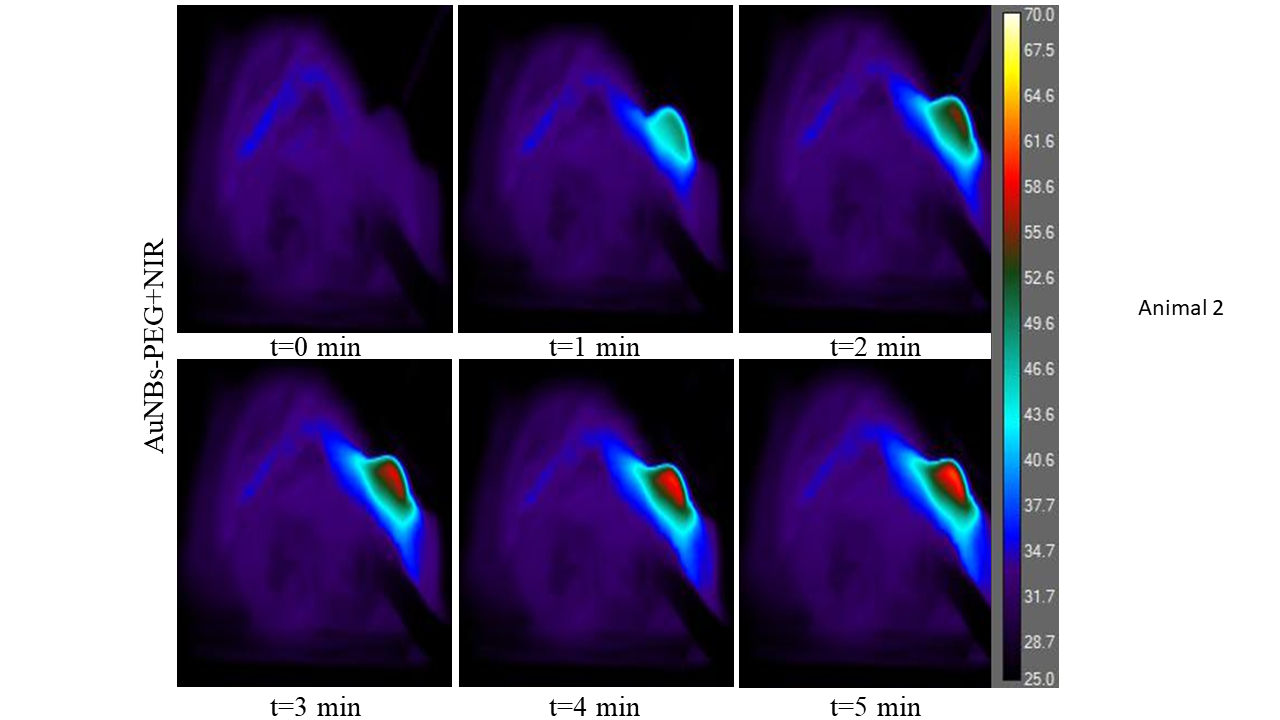


(d)

**Figure S5.** Thermographic images of the mice melanoma during NIR irradiation (785/62 nm, 0.9 W/cm2). (a, b) Thermographic images of the other 2 mice from the control group (Group 2) injected with 100 µL of PBS in the tail vein followed by NIR irradiation. (c, d) Thermographic images of the other 2 mice from the treatment group (Group 4) injected with 100 µL of AuNBs-PEG (10 mg/ml, Au content 1.4 mg/ml) followed by NIR irradiation.

**Table S2.** Temperatures (weighted averaged over the entire tumor surface) attained at the tumor site on irradiation.

| **Time (minutes)** | **Tumor temperatures** | | | | | |
| --- | --- | --- | --- | --- | --- | --- |
| **PBS+NIR** | | | **AuNBs-PEG+NIR** | | |
| Mice 1 | Mice 2 | Mice 3 | Mice 1 | Mice 2 | Mice 3 |
| 0 | 33.4 | 33.4 | 34.1 | 32.9 | 32.1 | 31.8 |
| 1 | 48.26 | 50.85 | 48.3 | 55.4 | 48.6 | 59.8 |
| 2 | 46.9 | 55.6 | 52.4 | 60 | 55.1 | 62.4 |
| 3 | 45.2 | 54.5 | 52.7 | 61.4 | 57.7 | 63.1 |
| 4 | 46.34 | 57.7 | 53.7 | 62.5 | 59.6 | 63.4 |
| 5 | 46.44 | 56.5 | 55 | 63.6 | 60.8 | 63.7 |


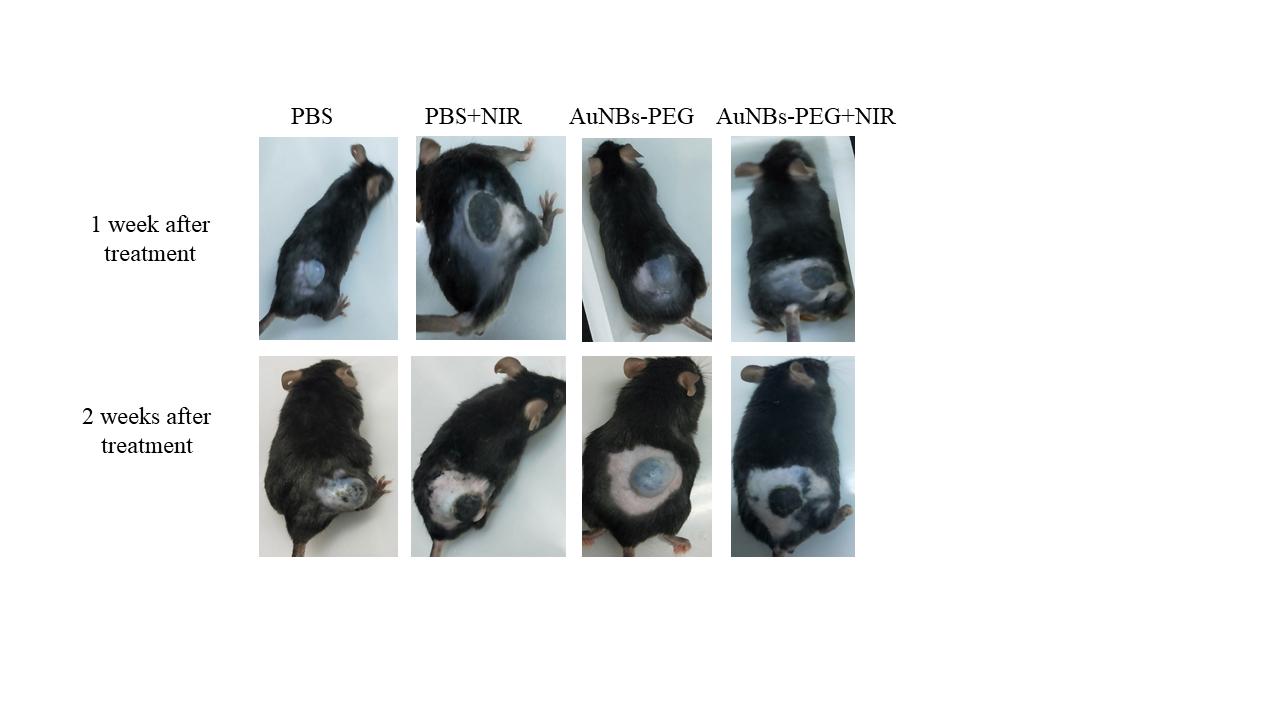


**Figure S6.** Visual images of the B16F10 melanoma tumor-bearing mice administered with various formulations followed by NIR irradiation of 785/62 nm, 0.9 Wcm-2 at 24 hours post-injection (in PBS+NIR and AuNBs-PEG+NIR groups only) during 1st and 2nd week after treatment.

**References**

1. Roper DK, Ahn W, Hoepfner M. Microscale heat transfer transduced by surface plasmon resonant gold nanoparticles. *J. Phys. Chem. C*. 111(9), 3636–3641 (2007).

2. Li J, Wang W, Zhao L, *et al.* Hydroquinone-assisted synthesis of branched au-ag nanoparticles with polydopamine coating as highly efficient photothermal agents. *ACS Appl. Mater. Interfaces*. 7(21), 11613–11623 (2015).
