# Supplementary material
Source: publisher figshare collection journal article supplement (https://future-science-group.figshare.com/articles/dataset/_/21186094)

|                         | Size (d.nm):  | % Intensity: | St Dev (d.nm): |
|-------------------------|---------------|--------------|----------------|
| Z-Average (d.nm): 188.5 | Peak 1: 204.1 | 100.0        | 58.38          |
| Pdl: 0.076              | Peak 2: 0.000 | 0.0          | 0.000          |
| Intercept: 0.968        | Peak 3: 0.000 | 0.0          | 0.000          |
| Result quality : Good   |               |              |                |

Size Distribution by Intensity

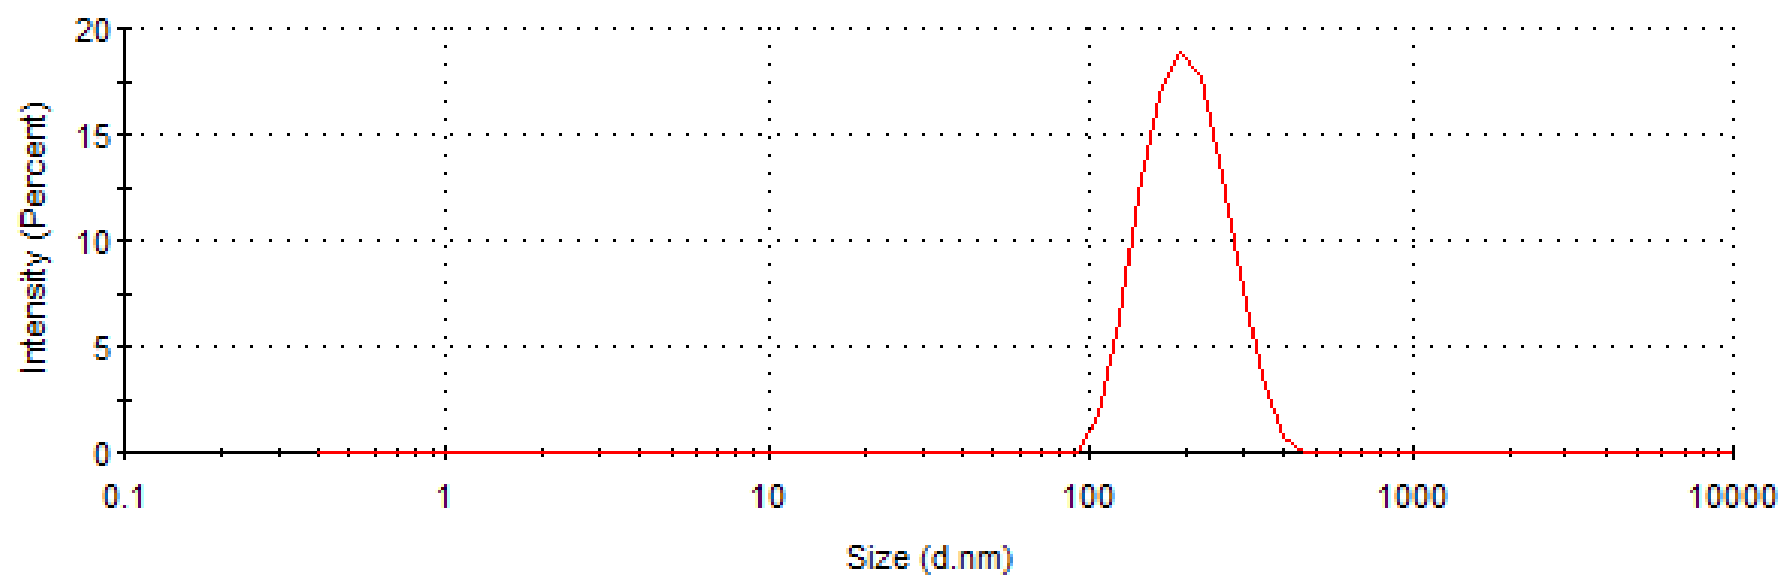

Supplement: Supplementary file 4 [file 1]
