# Supplementary material
Source: publisher figshare collection journal article supplement (https://future-science-group.figshare.com/articles/dataset/_/21186094)

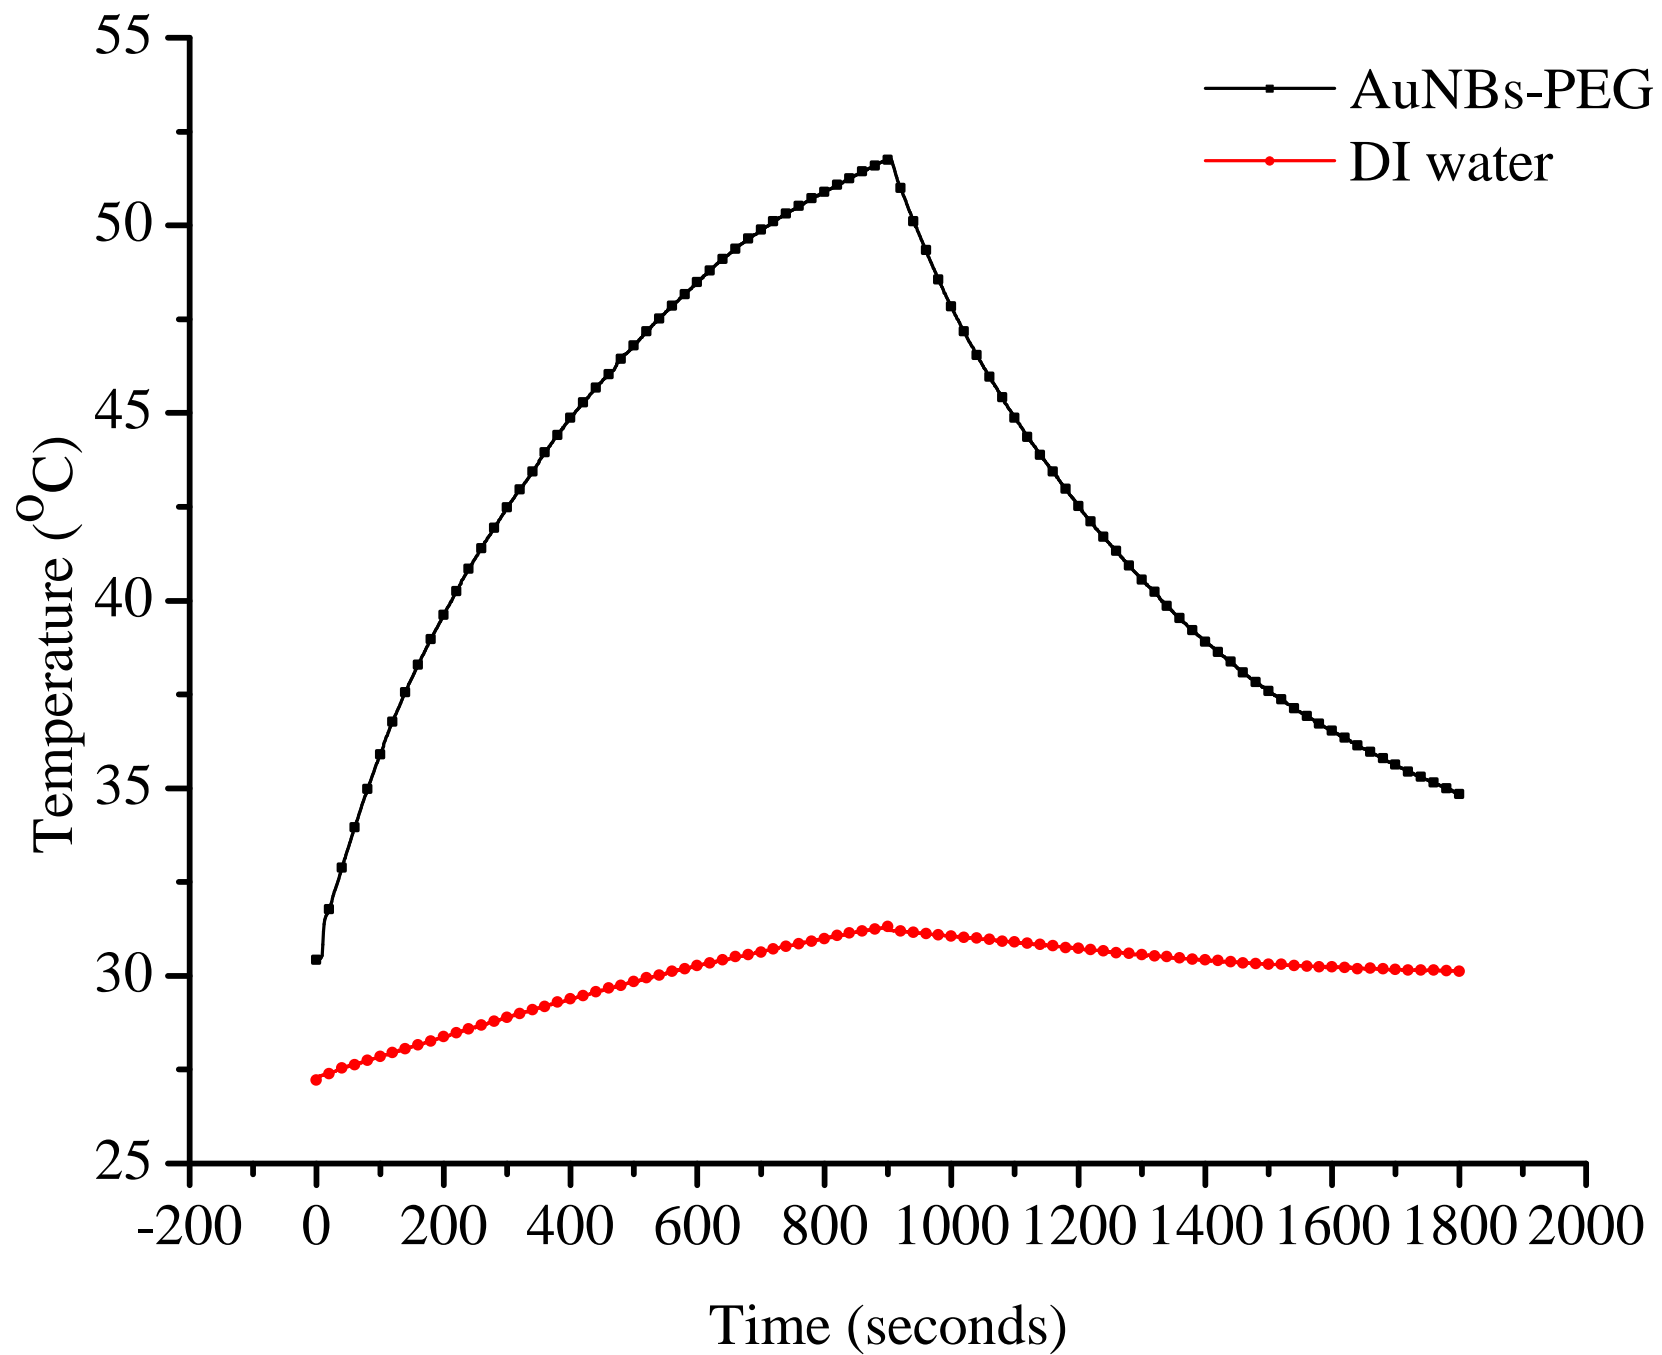

Supplement: Supplementary file 1 [file 1]

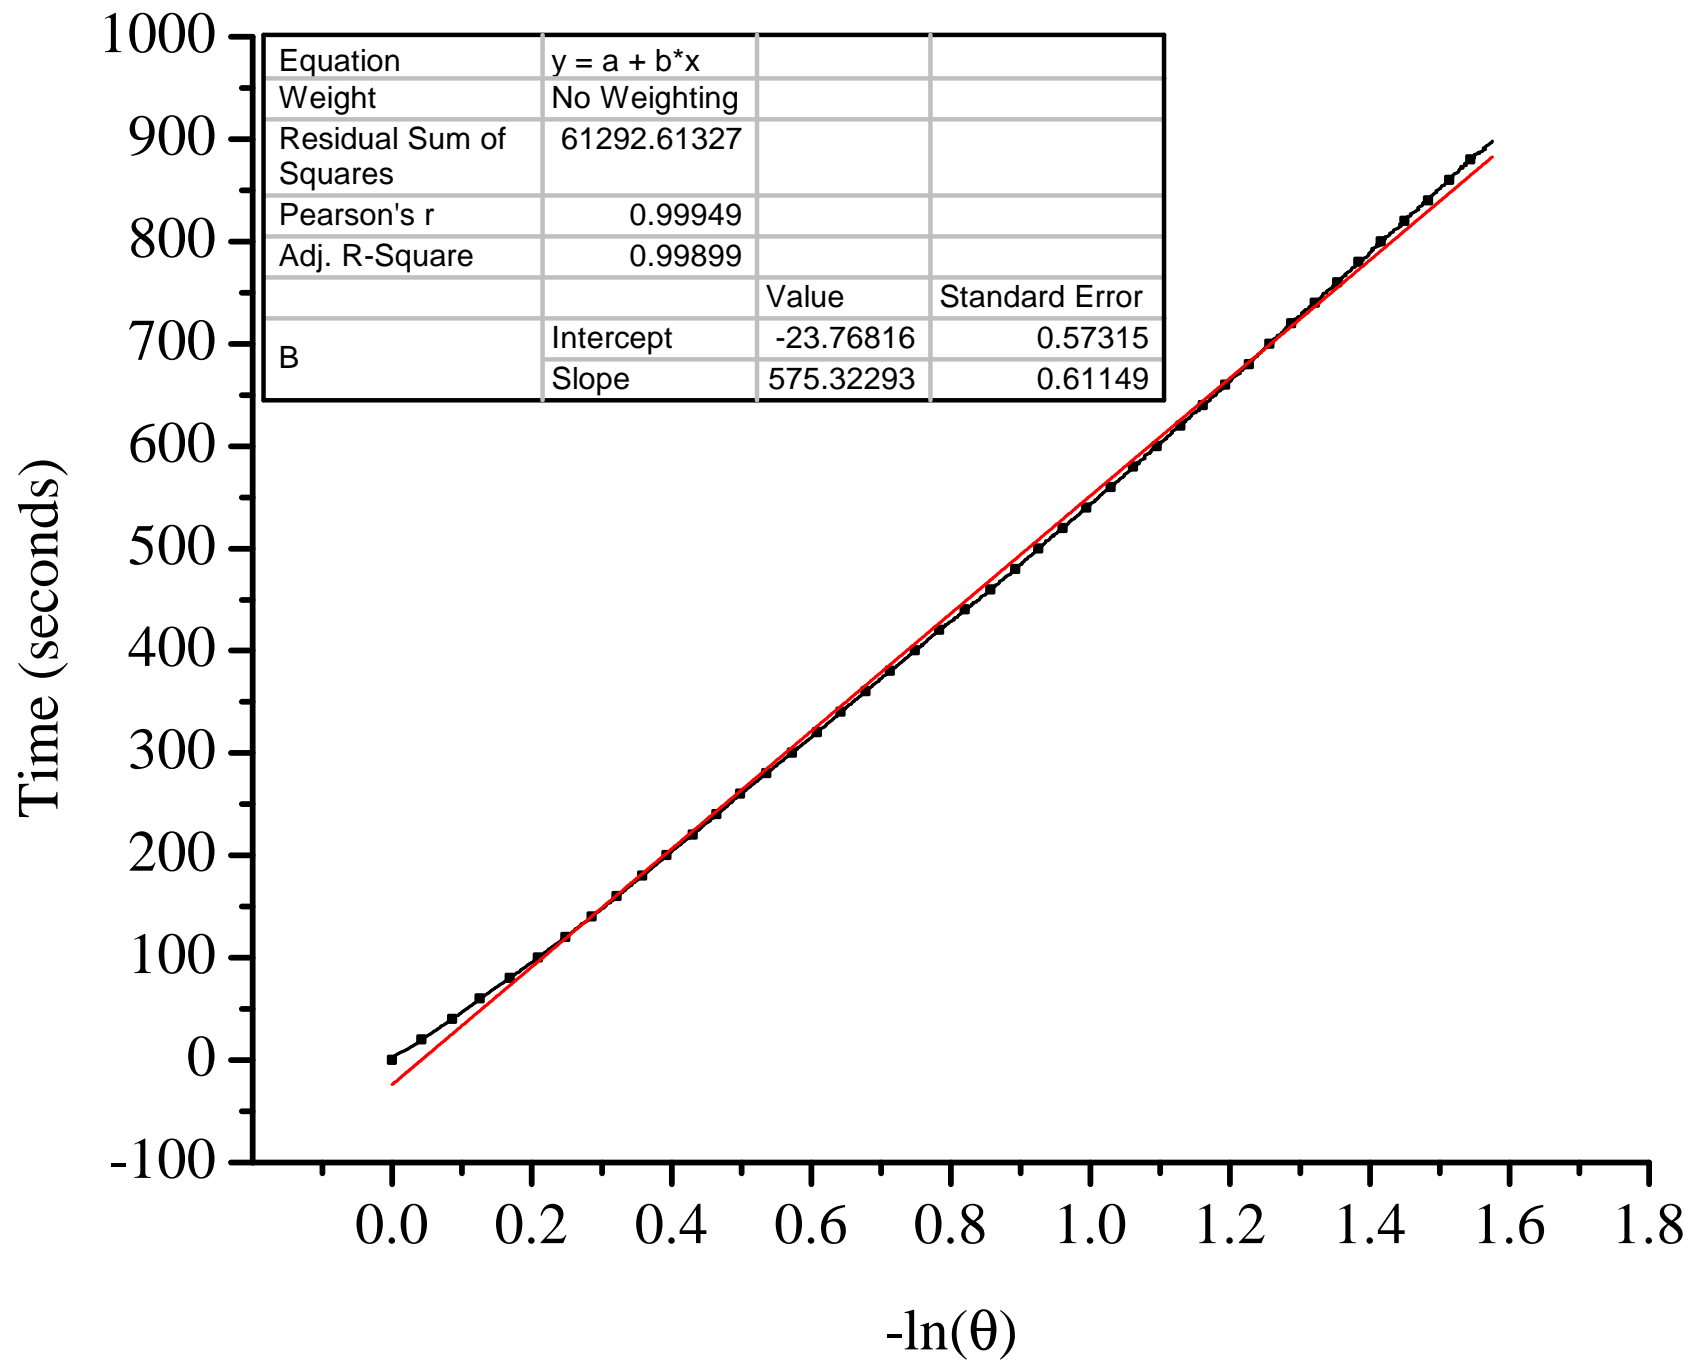

Supplement: Supplementary file 2 [file 1]

PBS+NIR

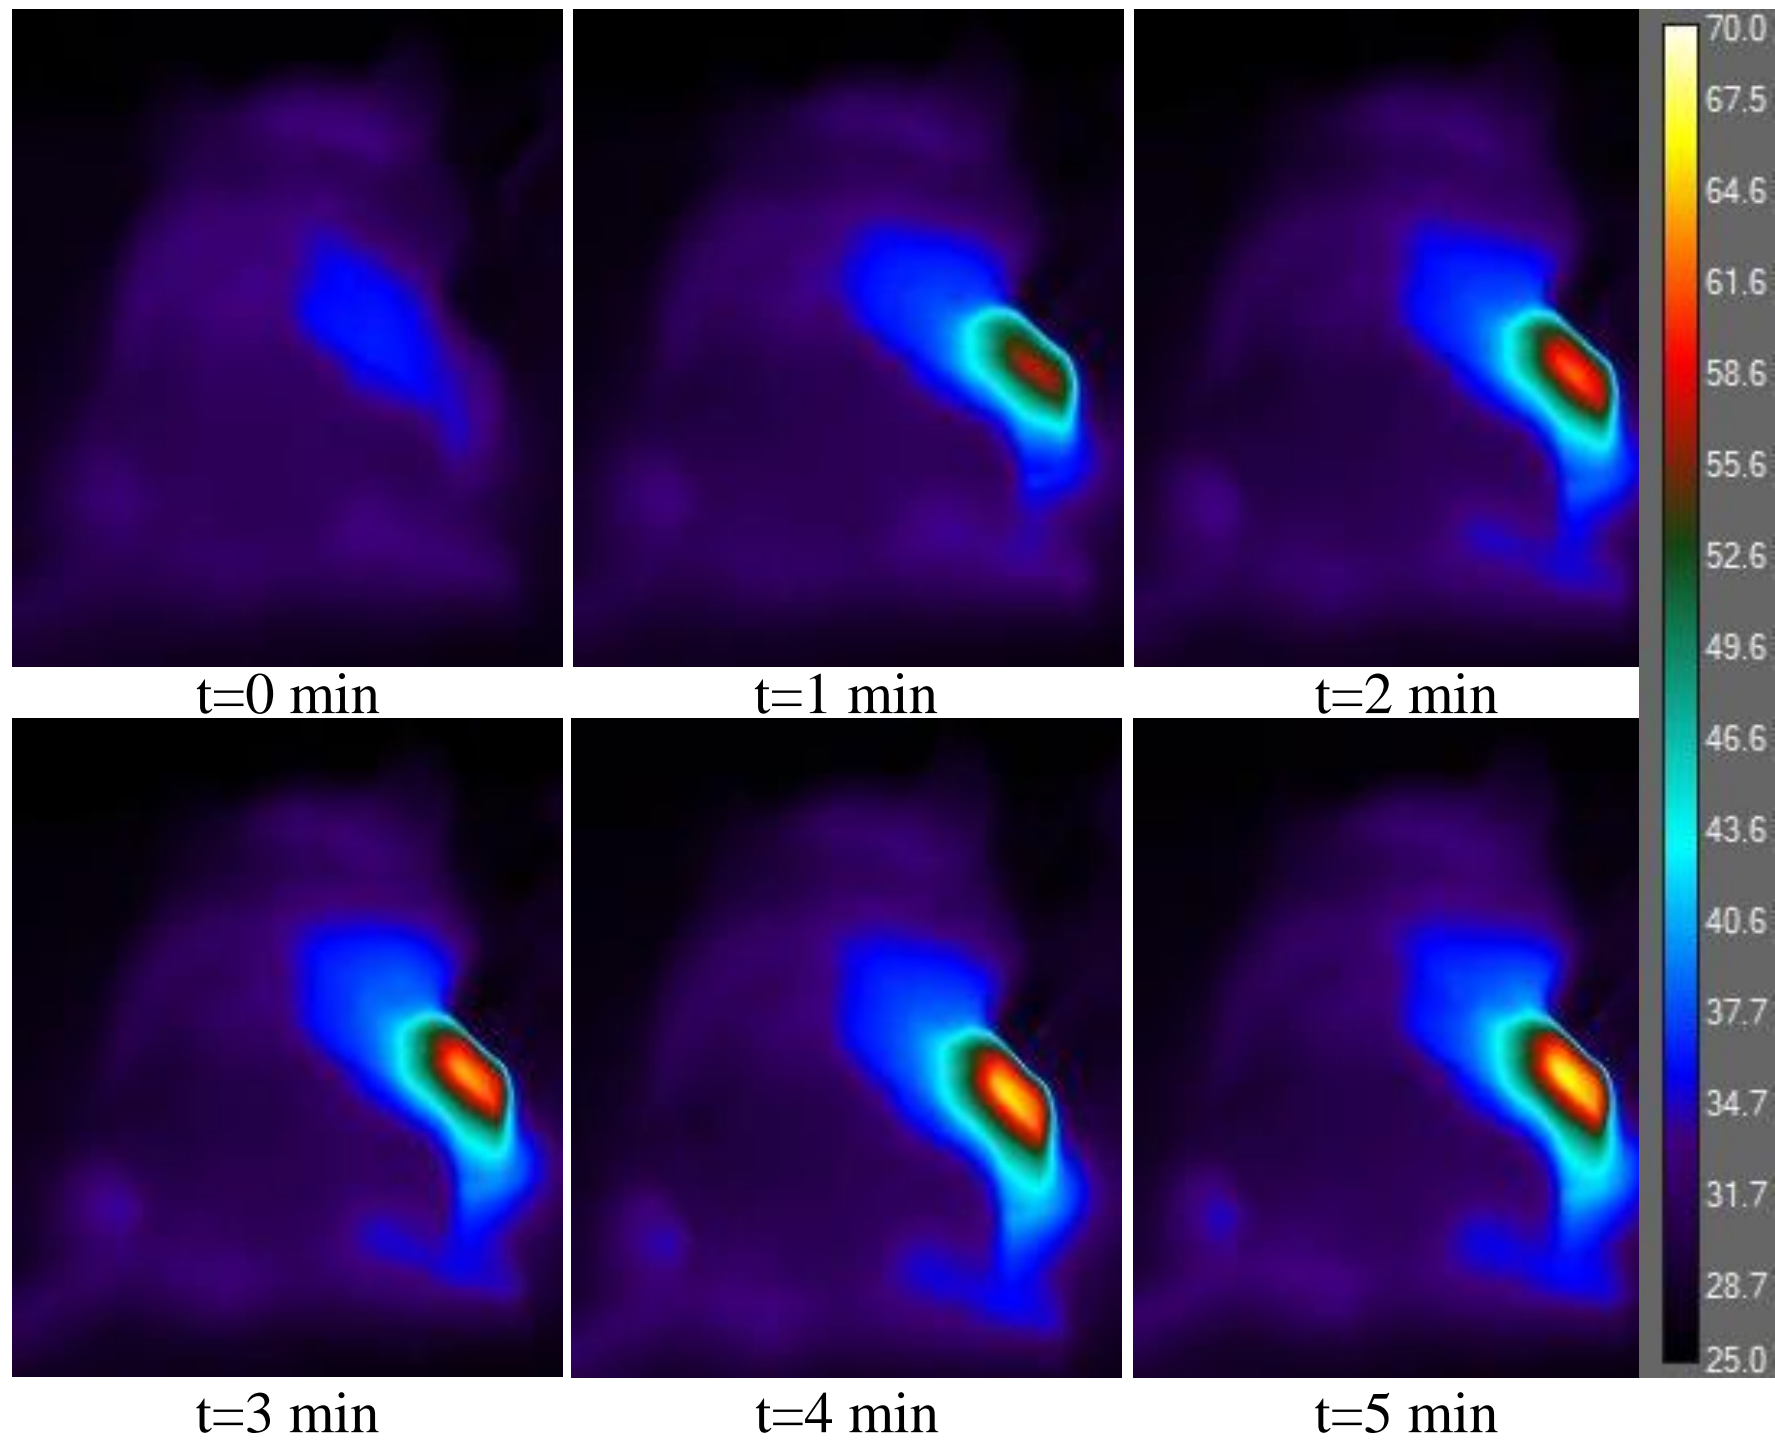

Supplement: Supplementary file 3 [file 1]

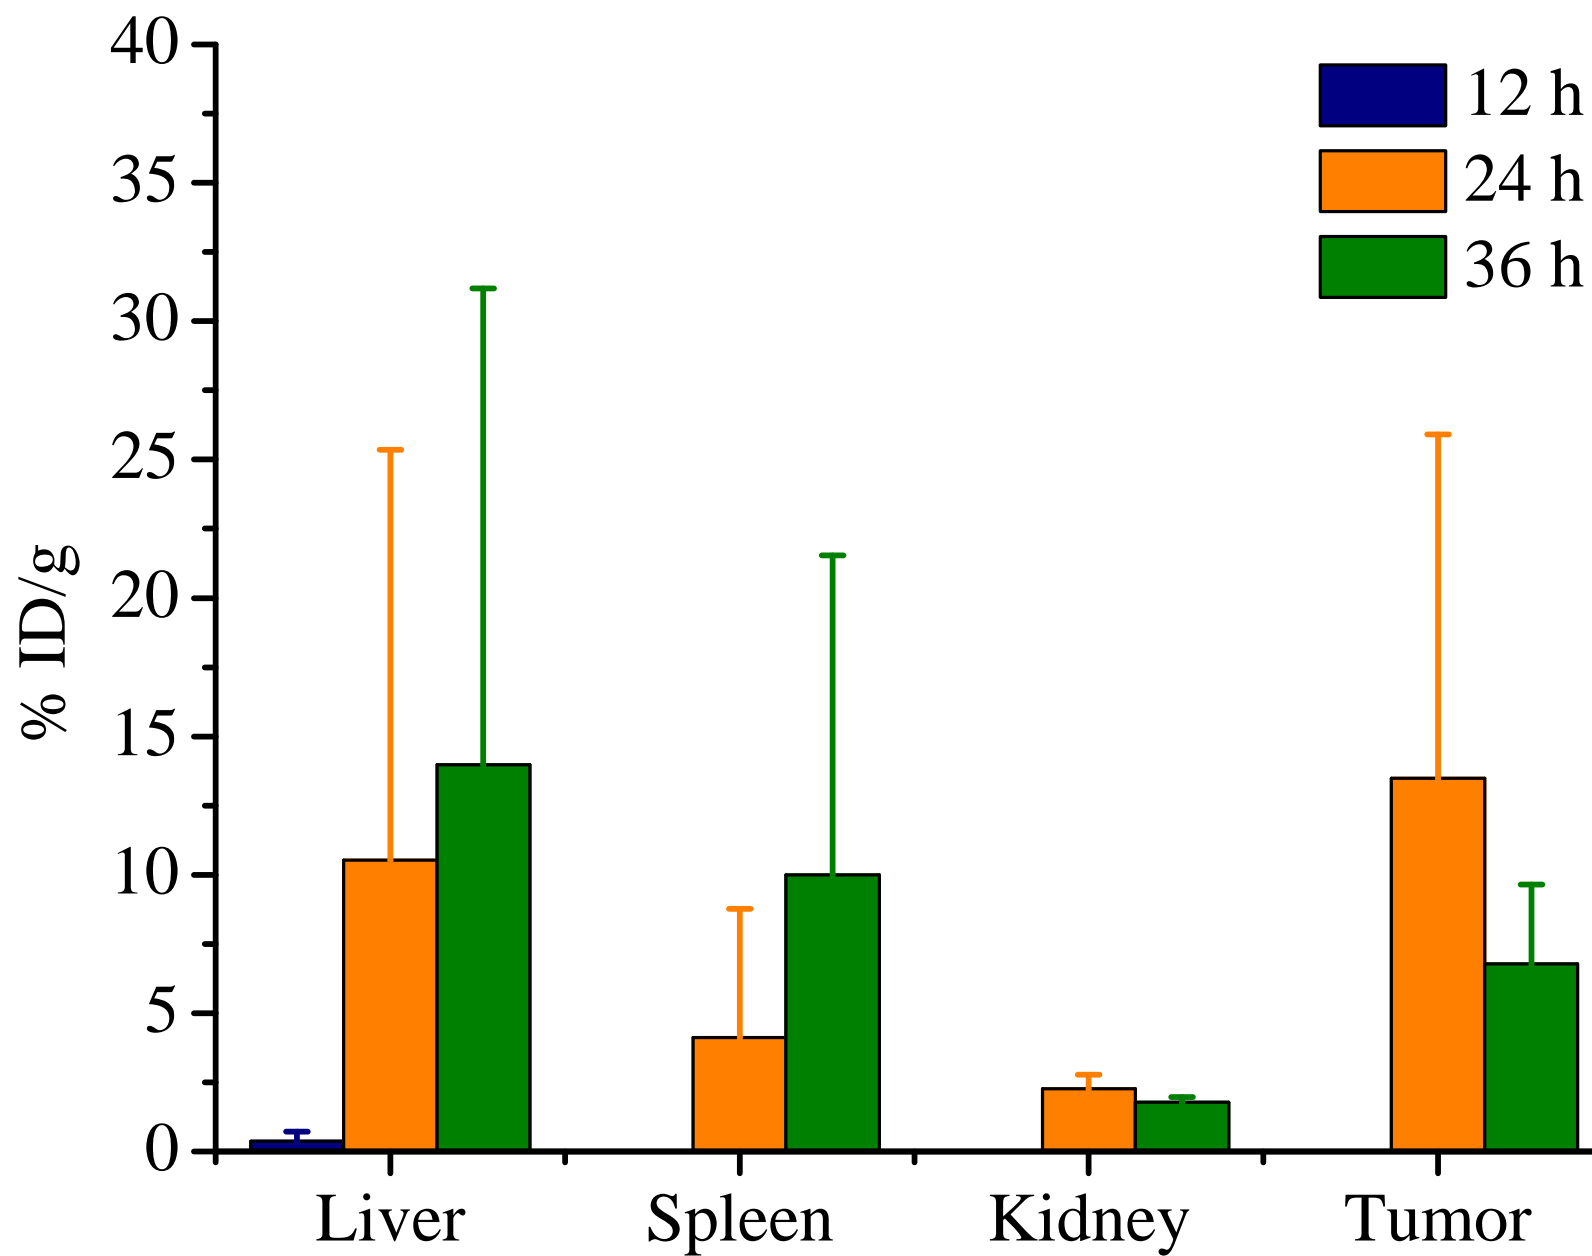

Supplement: Supplementary file 5 [file 1]

PBS+NIR

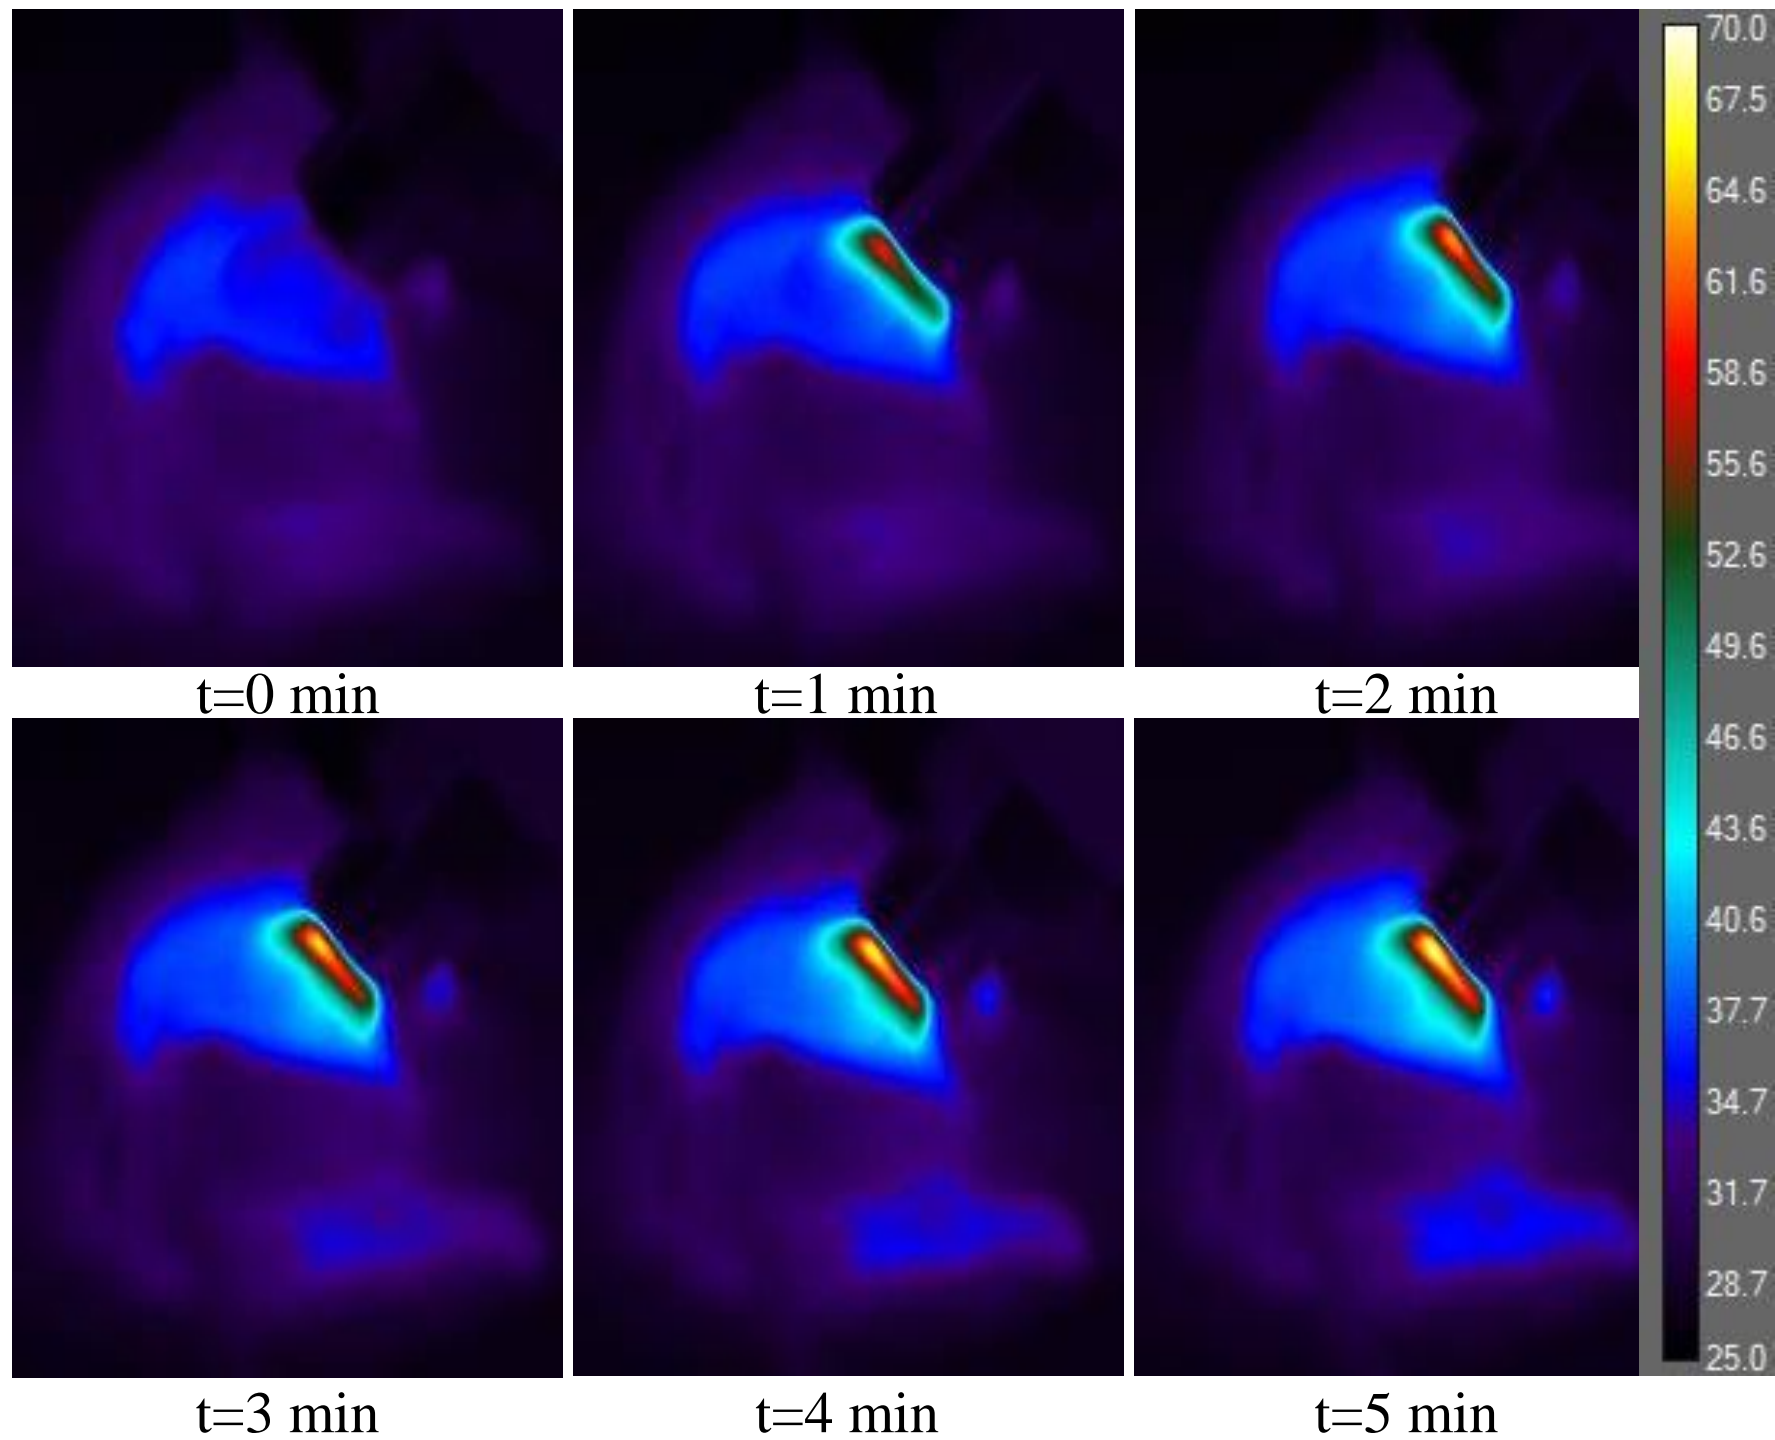

Supplement: Supplementary file 6 [file 1]

|                         | Size (d.nm):  | % Intensity: | St Dev (d.nm): |
|-------------------------|---------------|--------------|----------------|
| Z-Average (d.nm): 184.9 | Peak 1: 219.4 | 97.9         | 108.2          |
| Pdl: 0.213              | Peak 2: 4688  | 2.1          | 787.0          |
| Intercept: 0.961        | Peak 3: 0.000 | 0.0          | 0.000          |

Result quality : **Good**

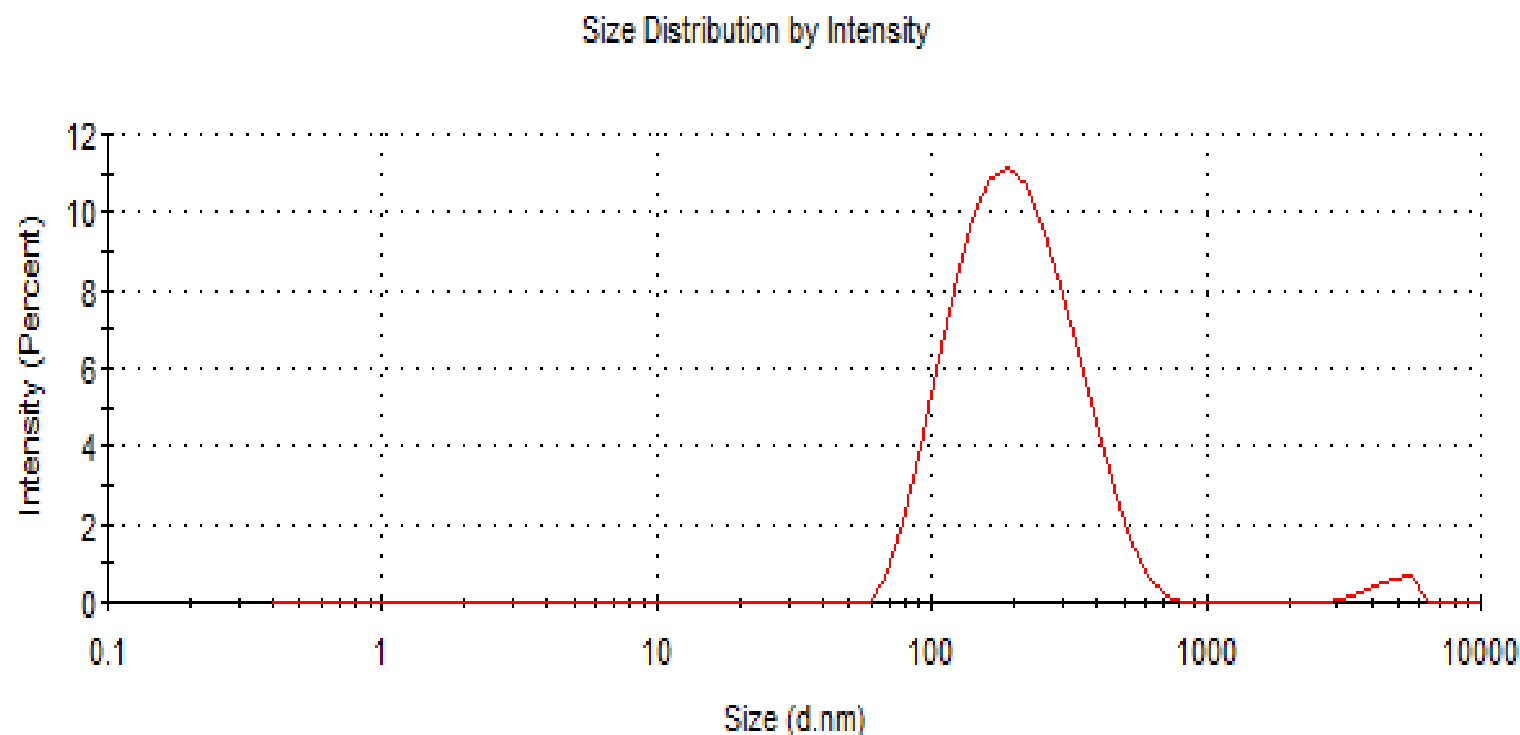

Supplement: Supplementary file 7 [file 1]

AuNB<sub>s</sub>-PEG+NIR

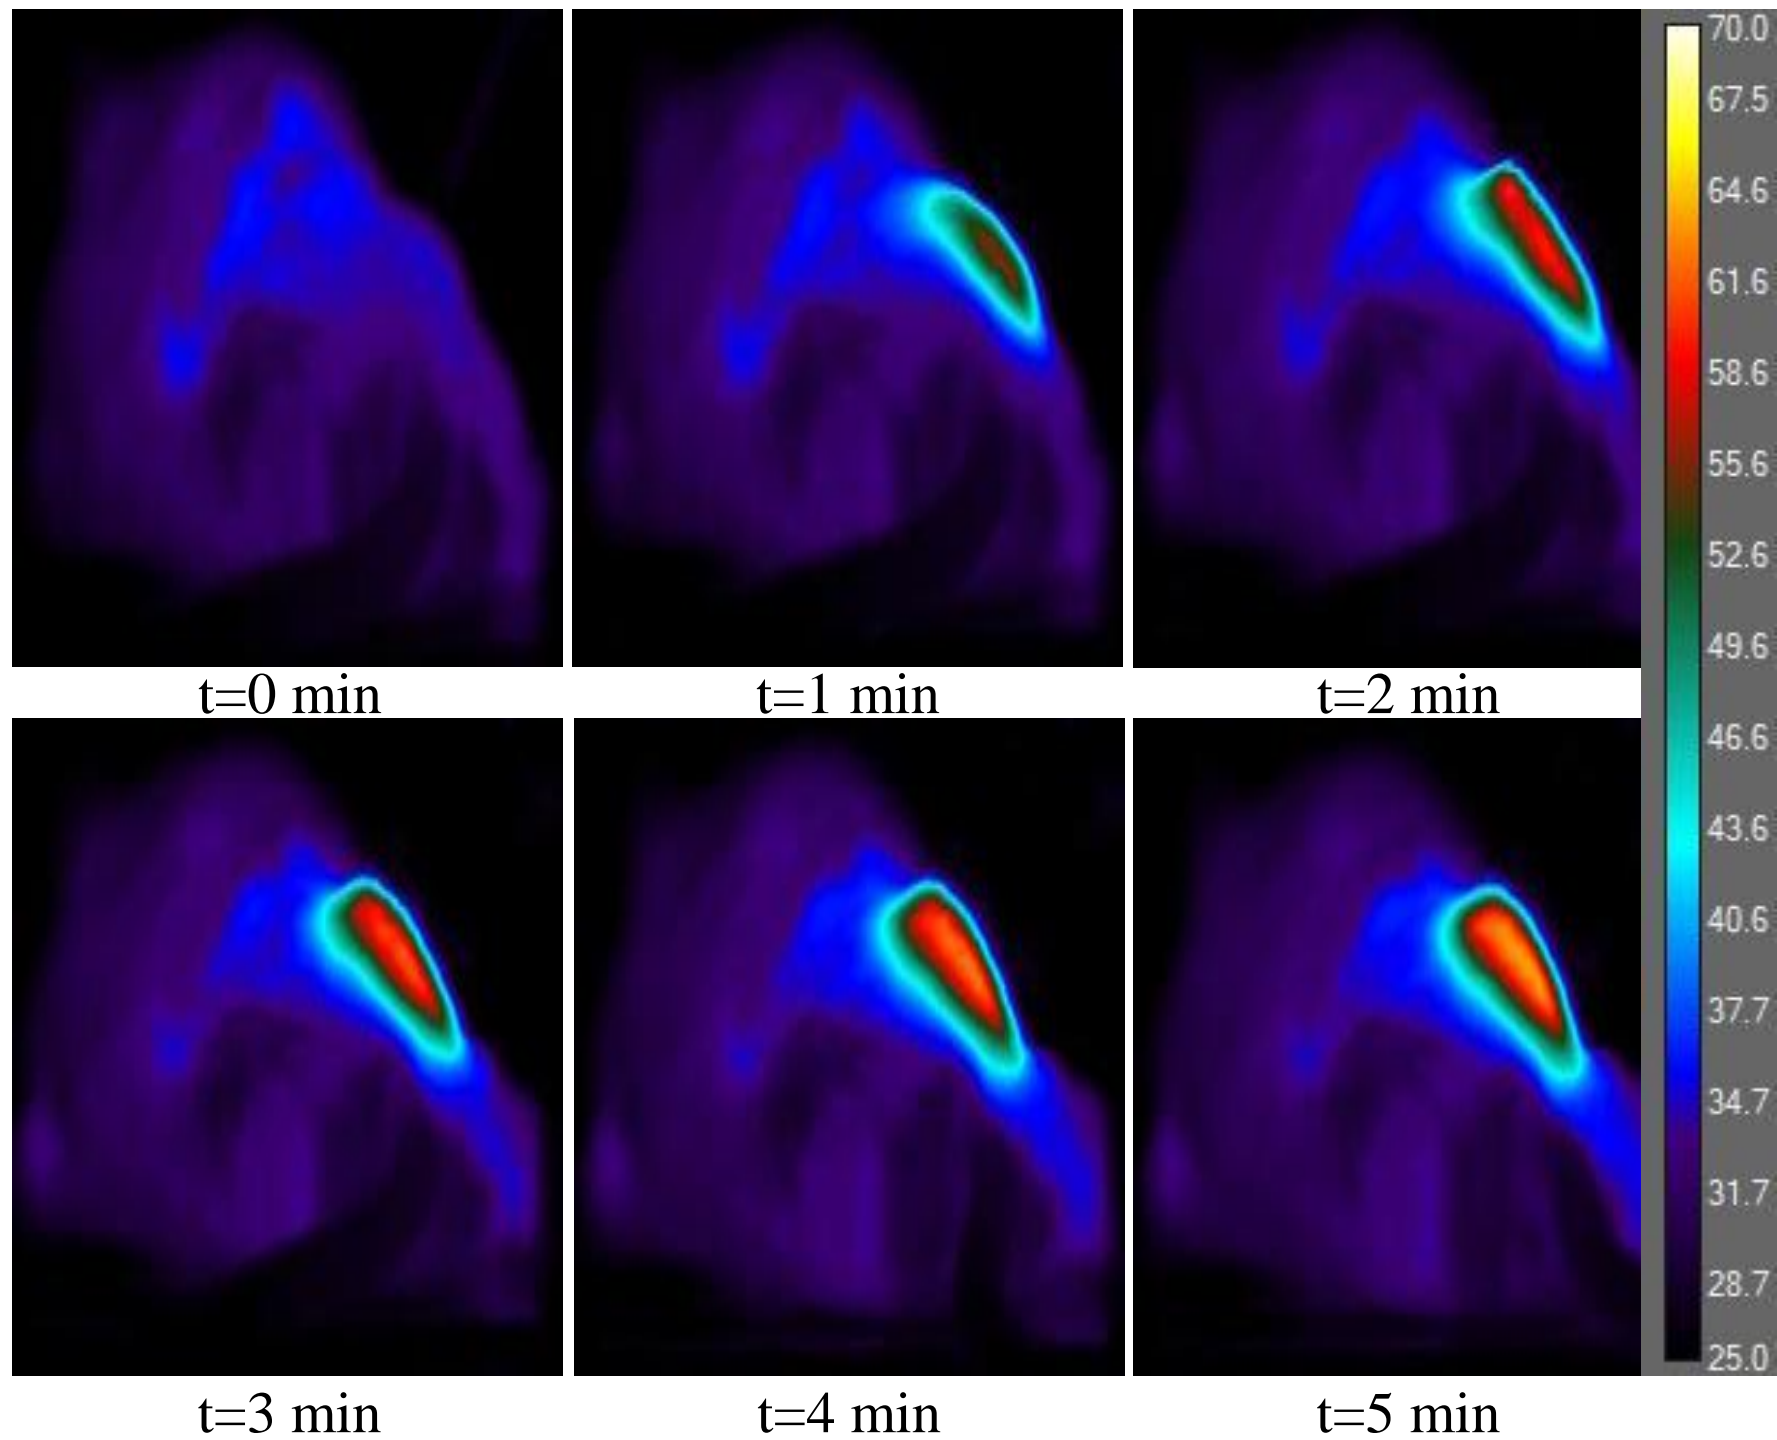

Supplement: Supplementary file 8 [file 1]

PBS

PBS+NIR

AuNBs-PEG

AuNBs-PEG+NIR

1 week after  
treatment

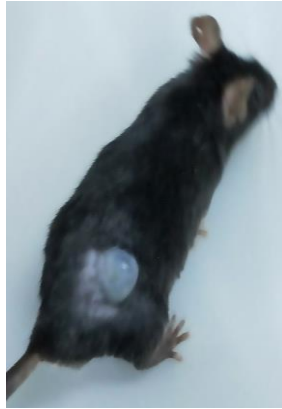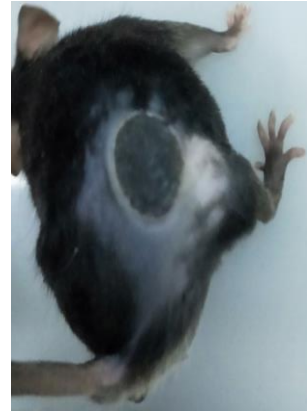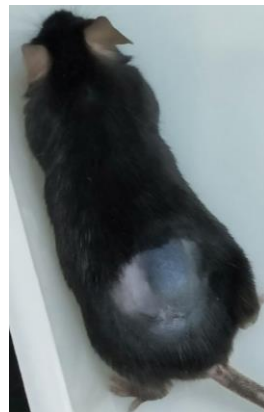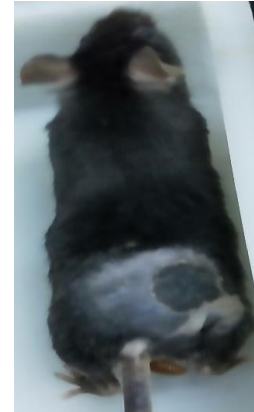

2 weeks after  
treatment

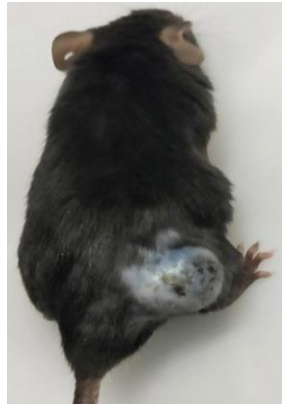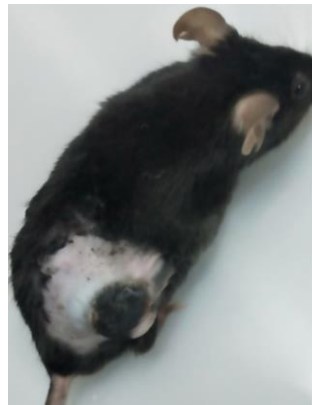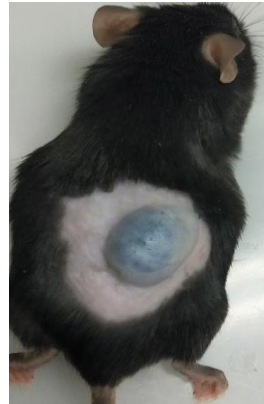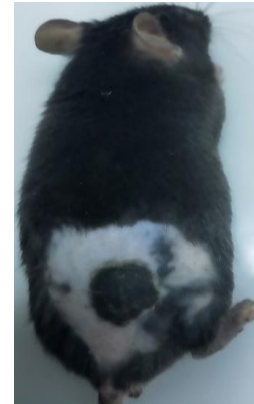

Supplement: Supplementary file 9 [file 1]

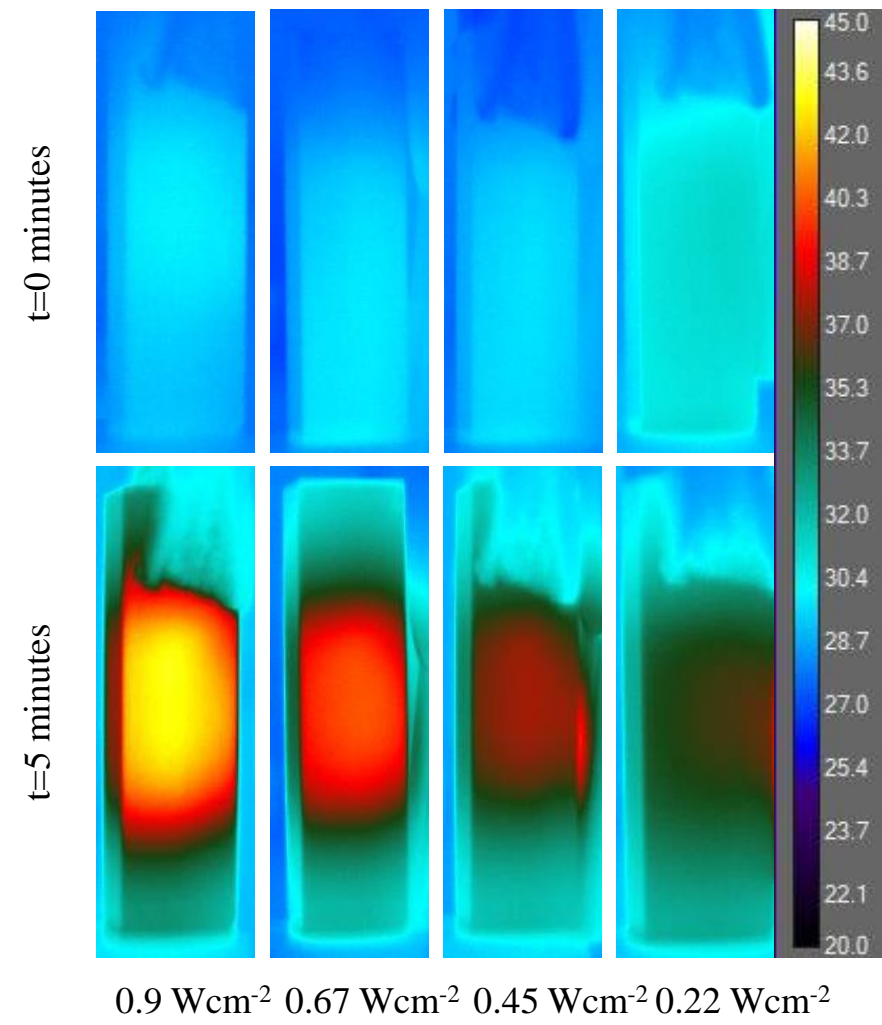

Supplement: Supplementary file 10 [file 1]

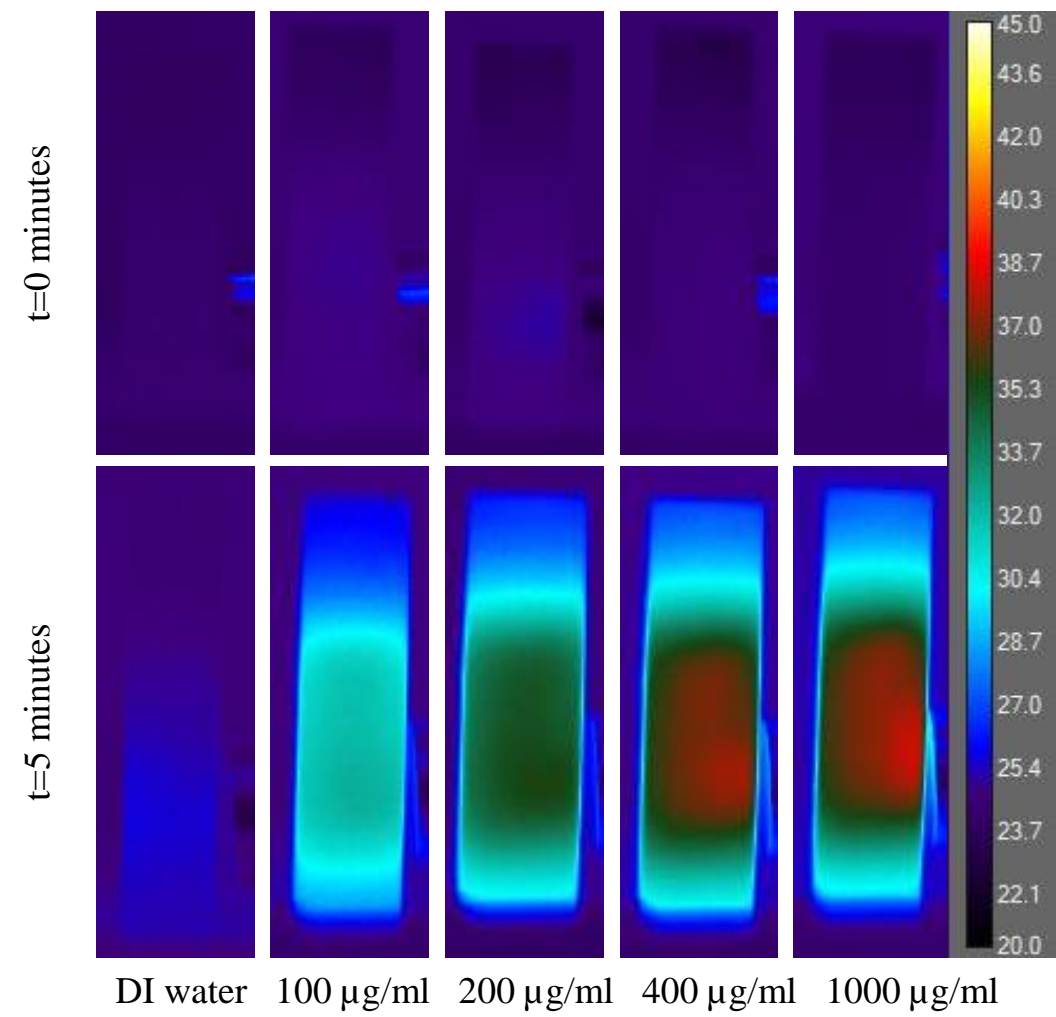

Supplement: Supplementary file 11 [file 1]

AuNB<sub>s</sub>-PEG+NIR

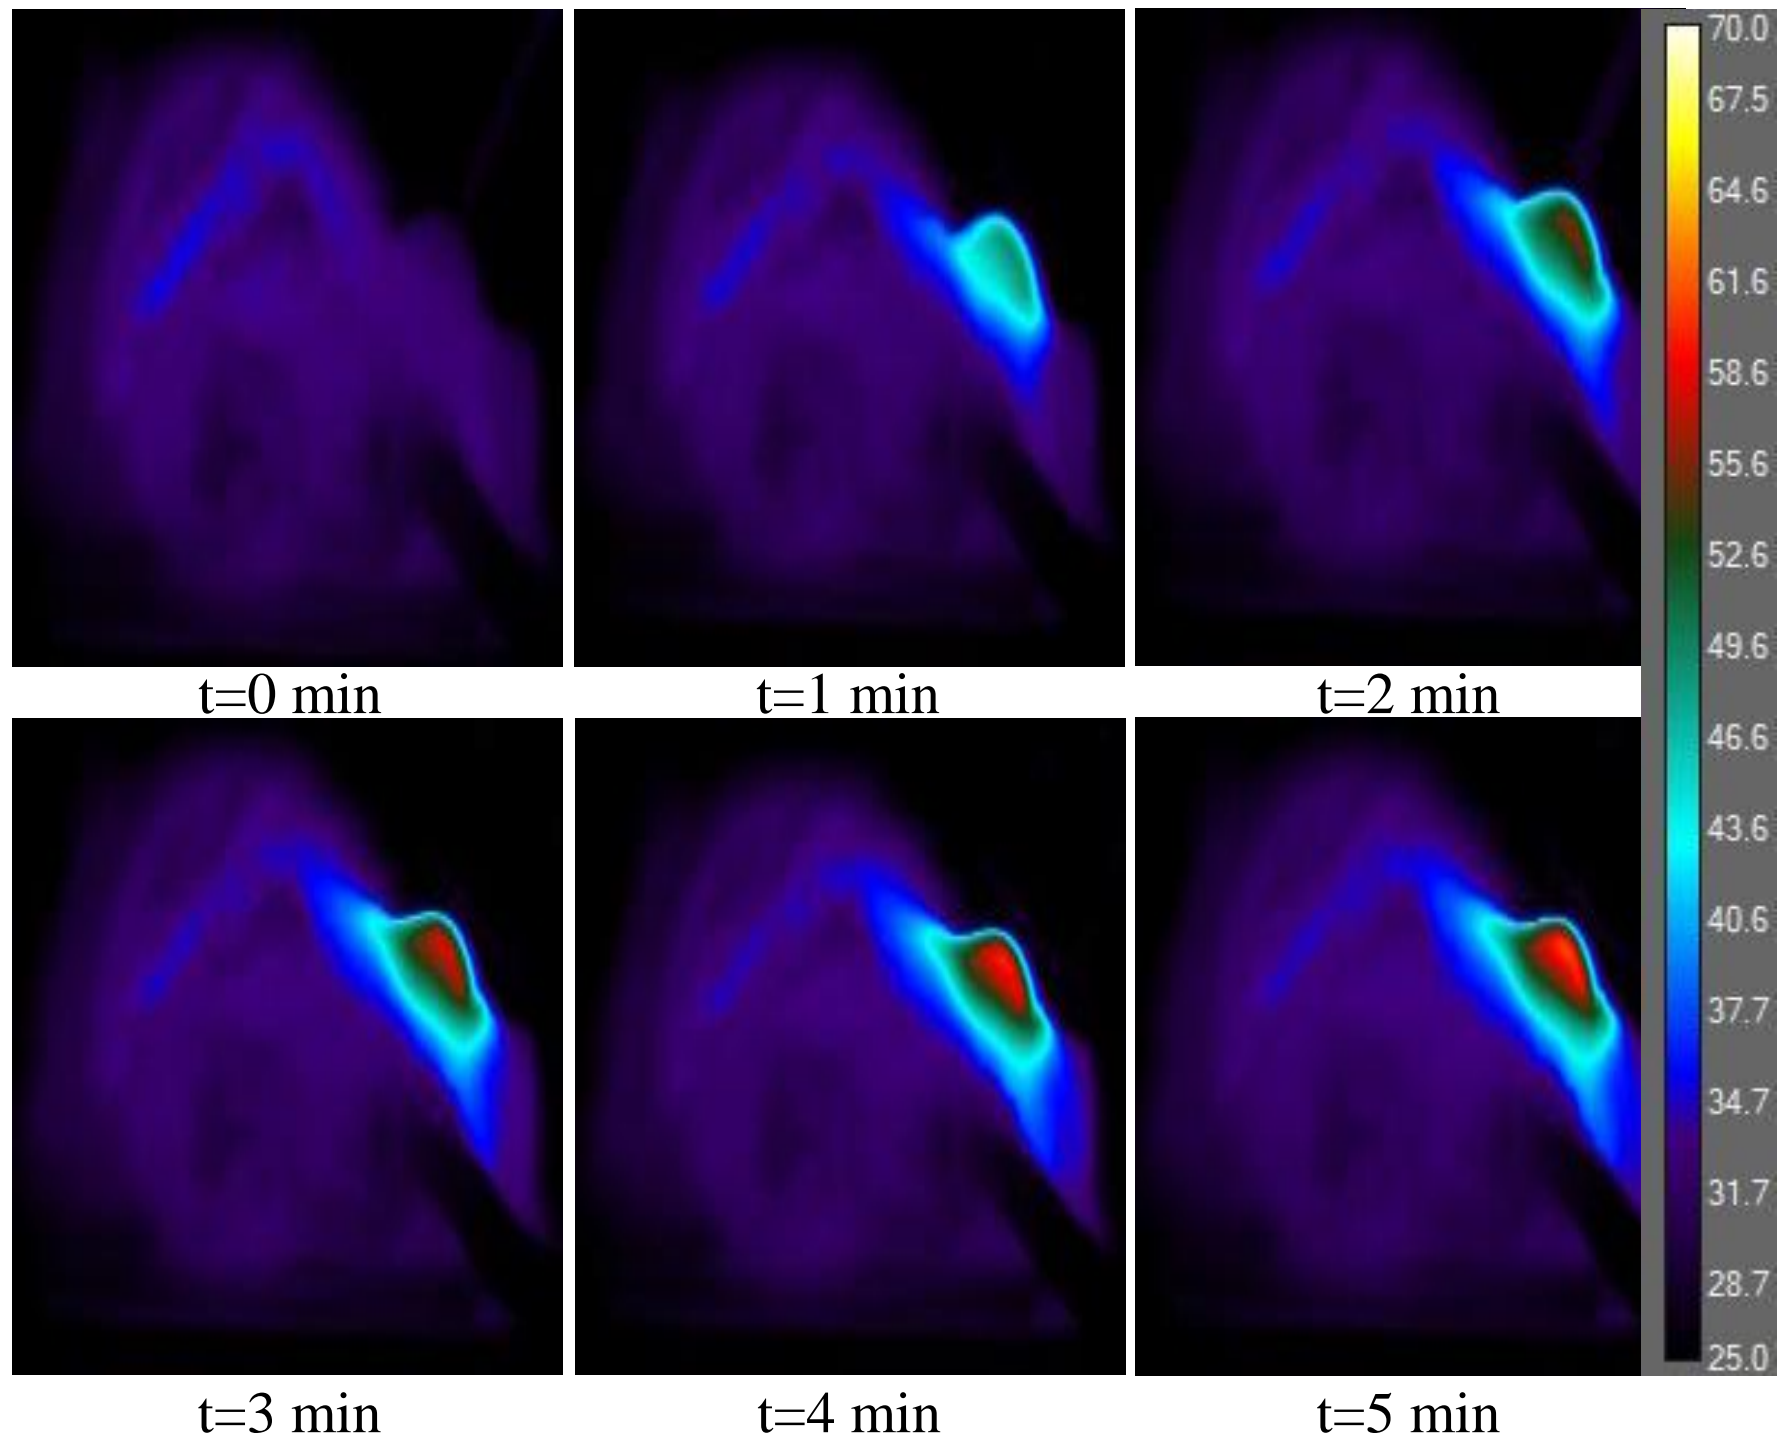

Supplement: Supplementary file 12 [file 1]
